# Supplementary material
Source: PubMed Central journal article supplement (PMC3138301)
Supplement: supp_M111.235200_jbc.M111.235200-1.pdf [file supp_M111.235200_jbc.M111.235200-1.pdf]

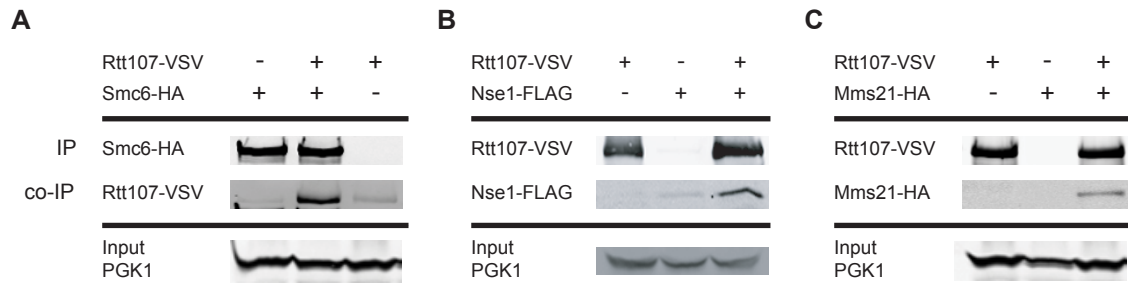

**Supplementary Figure 1. Rtt107 interacted with multiple subunits of the SMC5/6 complex.** Analytical-scale immunoprecipitations were performed on whole-cell extracts of the indicated strains. Immunoblotting was performed using the indicated antibodies. Pgk1 in the input fraction was used as a loading control. (A) Rtt107-VSV co-purified with Smc6-HA. (B) Nse1-FLAG co-purified with Rtt107-VSV. (C) Mms21-HA co-purified with Rtt107-VSV.

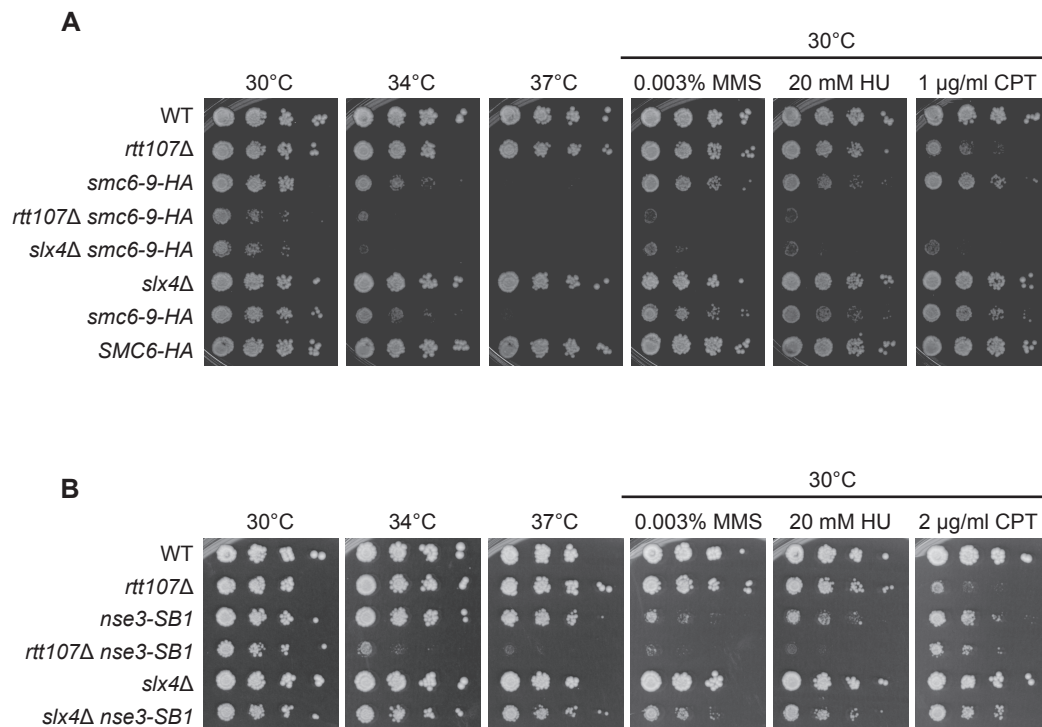

**Supplementary Figure 2. *Rtt107* and *Slx4* had functions that were independent of the SMC5/6 complex.** Tenfold serial dilutions of the indicated strains were plated onto media containing various DNA damaging agents and incubated at the indicated temperatures. Double mutants containing (A) *smc6-9* or (B) *nse3-SB1* and *rtt107Δ* or *slx4Δ* grew significantly more slowly than the respective single mutants.

**Supplementary Table 1. Yeast strains used in this study**

| Strain  | Relevant Genotype                                                                                                                                                                                                 | Source* |
|---------|-------------------------------------------------------------------------------------------------------------------------------------------------------------------------------------------------------------------|---------|
| MKY6    | <i>MATa can1-100 his3-11 leu2-3,112 trp1-1 ura3-1 lys2Δ</i>                                                                                                                                                       |         |
| MKY7    | <i>MATa ade2-1 can1-100 his3-11 leu2-3,112 trp1-1 ura3-1</i>                                                                                                                                                      |         |
| MKY399  | <i>MATa can1-100 his3-11 leu2-3,112 trp1-1 ura3-1 lys2Δ</i>                                                                                                                                                       |         |
| MKY102  | MKY7, <i>RTT107-TAP::TRP1</i>                                                                                                                                                                                     |         |
| MKY103  | MKY7, <i>SLX4-TAP::TRP1</i>                                                                                                                                                                                       |         |
| MKY107  | MKY7, <i>NSE5-3XFLAG::KANMX6</i>                                                                                                                                                                                  |         |
| MKY108  | MKY7, <i>RTT107-TAP::TRP1 NSE5-3XFLAG::KANMX6</i>                                                                                                                                                                 |         |
| MKY109  | MKY7, <i>SLX4-TAP::TRP1 NSE5-3XFLAG::KANMX6</i>                                                                                                                                                                   |         |
| MKY123  | MKY7, <i>RTT107-TAP::TRP1 NSE5-3XFLAG::KANMX6 slx4::HIS3</i>                                                                                                                                                      |         |
| MKY124  | MKY7, <i>NSE5-3XFLAG::KANMX6 rtt107::HIS3 [pRS314, 4XTAP]</i>                                                                                                                                                     |         |
| MKY125  | MKY7, <i>NSE5-3XFLAG::KANMX6 rtt107::HIS3 [pRS314, 4XTAP-RTT107aa1-1070]</i>                                                                                                                                      |         |
| MKY126  | MKY7, <i>NSE5-3XFLAG::KANMX6 rtt107::HIS3 [pRS314, 4XTAP-RTT107aa1-512]</i>                                                                                                                                       |         |
| MKY127  | MKY7, <i>NSE5-3XFLAG::KANMX6 rtt107::HIS3 [pRS314, 4XTAP-RTT107aa512-1070]</i>                                                                                                                                    |         |
| MKY139  | MKY7, <i>rtt107::HIS3 [pRS314, 4XTAP]</i>                                                                                                                                                                         |         |
| MKY140  | MKY7, <i>rtt107::HIS3 [pRS314, 4XTAP-RTT107aa1-1070]</i>                                                                                                                                                          |         |
| MKY141  | MKY7, <i>rtt107::HIS3 [pRS314, 4XTAP-RTT107aa1-512]</i>                                                                                                                                                           |         |
| MKY142  | MKY7, <i>rtt107::HIS3 [pRS314, 4XTAP-RTT107aa512-1070]</i>                                                                                                                                                        |         |
| MKY1237 | <i>PJ69-4a/α (MATa/α trp1-901/trp1-901 leu2-3,112/leu2-3,112 ura3-52/ura3-52 his3-200/his3-200 ga14A/ga14A ga18OA/ga18OA LYSZ::GALI-HIS3/LYSZ::GALI-HIS3 GAL2-ADE2/GAL2-ADE2 metZ::GAL7-lacZ/metZ::GAL7-lacZ)</i> | (1)     |
| MKY1238 | MKY1237, <i>[pGAL4 DBD-Dest] [pGAL4 AD-Dest]</i>                                                                                                                                                                  |         |
| MKY1239 | MKY1237, <i>[pGAL4 DBD-RTT107aa1-1070] [pGAL4 AD-Dest]</i>                                                                                                                                                        |         |
| MKY1240 | MKY1237, <i>[pGAL4 DBD-RTT107aa1-1070] [pGAL4 AD-RTT107aa1-1070]</i>                                                                                                                                              |         |
| MKY1241 | MKY1237, <i>[pGAL4 DBD-RTT107aa1-1070] [pGAL4 AD-SMC5]</i>                                                                                                                                                        |         |
| MKY1242 | MKY1237, <i>[pGAL4 DBD-RTT107aa1-1070] [pGAL4 AD-SMC6]</i>                                                                                                                                                        |         |
| MKY1243 | MKY1237, <i>[pGAL4 DBD-RTT107aa1-1070] [pGAL4 AD-NSE1]</i>                                                                                                                                                        |         |
| MKY1244 | MKY1237, <i>[pGAL4 DBD-RTT107aa1-1070] [pGAL4 AD-MMS21]</i>                                                                                                                                                       |         |
| MKY1245 | MKY1237, <i>[pGAL4 DBD-RTT107aa1-1070] [pGAL4 AD-NSE3]</i>                                                                                                                                                        |         |
| MKY1246 | MKY1237, <i>[pGAL4 DBD-RTT107aa1-1070] [pGAL4 AD-NSE4]</i>                                                                                                                                                        |         |
| MKY1247 | MKY1237, <i>[pGAL4 DBD-RTT107aa1-1070] [pGAL4 AD-NSE5]</i>                                                                                                                                                        |         |
| MKY1248 | MKY1237, <i>[pGAL4 DBD-RTT107aa1-1070] [pGAL4 AD-NSE6]</i>                                                                                                                                                        |         |
| MKY1249 | MKY1237, <i>[pGAL4 DBD-RTT107aa1-512] [pGAL4 AD-Dest]</i>                                                                                                                                                         |         |
| MKY1250 | MKY1237, <i>[pGAL4 DBD-RTT107aa1-512] [pGAL4 AD-NSE6]</i>                                                                                                                                                         |         |
| MKY1251 | MKY1237, <i>[pGAL4 DBD-RTT107aa512-1070] [pGAL4 AD-Dest]</i>                                                                                                                                                      |         |
| MKY1252 | MKY1237, <i>[pGAL4 DBD-RTT107aa512-1070] [pGAL4 AD-NSE6]</i>                                                                                                                                                      |         |
| MKY1253 | MKY1237, <i>[pGAL4 DBD-Dest] [pGAL4 AD-NSE6]</i>                                                                                                                                                                  |         |
| MKY1254 | MKY1237, <i>[pGAL4 DBD-NSE6] [pGAL4 AD-Dest]</i>                                                                                                                                                                  |         |
| MKY1255 | MKY1237, <i>[pGAL4 DBD-NSE6] [pGAL4 AD-SMC5]</i>                                                                                                                                                                  |         |
| MKY1256 | MKY1237, <i>[pGAL4 DBD-NSE6] [pGAL4 AD-NSE5]</i>                                                                                                                                                                  |         |

|         |                                                                                                            |                 |
|---------|------------------------------------------------------------------------------------------------------------|-----------------|
| MKY1101 | JKM139 ( <i>MATa hoΔ hmlΔ::ADE1 hmrΔ::ADE1 ade1-100 leu2-3,112 lys5 trp1::hisG ura3-52 ade3::GAL::HO</i> ) | (2)             |
| MKY1102 | JKM179 ( <i>MATa hoΔ hmlΔ::ADE1 hmrΔ::ADE1 ade1-100 leu2-3,112 lys5 trp1::hisG ura3-52 ade3::GAL::HO</i> ) | (2)             |
| MKY1257 | MKY1102, <i>RTT107-3XFLAG::NATMX6</i>                                                                      |                 |
| MKY1258 | MKY1101, <i>SMC5-3XFLAG::NATMX6</i>                                                                        |                 |
| MKY1259 | MKY1101, <i>SMC5-3XFLAG::NATMX6 rtt107::KANMX6</i>                                                         |                 |
| MKY1260 | <i>ade2-1 trp1-1 his3-11 his3-15 ura3-1 leu2-3 leu2-112 Cir0 LEU2::GAL10-Flp(H305L)::leu2Δ1 fob1::HIS</i>  | Parent from (3) |
| MKY1261 | MKY1260, <i>RTT107-3XFLAG::NATMX6</i>                                                                      |                 |
| MKY1262 | MKY1260, <i>3XRFB-G418-FRT RTT107-3XFLAG::NATMX6</i>                                                       |                 |
| MKY1263 | MKY1260, <i>SMC5-3XFLAG::NATMX6</i>                                                                        |                 |
| MKY1264 | MKY1260, <i>3XRFB-G418-FRT SMC5-3XFLAG::NATMX6</i>                                                         |                 |
| MKY1265 | MKY1260, <i>SMC5-3XFLAG::NATMX6 rtt107::KANMX6</i>                                                         |                 |
| MKY1266 | MKY1260, <i>3XRFB-G418-FRT SMC5-3XFLAG::NATMX6 rtt107::KANMX6</i>                                          |                 |
| MKY1267 | MKY6, <i>RTT107-3XFLAG::KANMX6</i>                                                                         |                 |
| MKY1268 | MKY6, <i>RTT107-3XFLAG::KANMX6 nse3-SB1::URA3</i>                                                          | Parent from (4) |
| MKY1269 | MKY6, <i>RTT107-3XFLAG::KANMX6 nse5-R103G::NATMX6</i>                                                      |                 |
| MKY1270 | MKY6, <i>RTT107-3XFLAG::KANMX6 smc6-9-3XHA::HIS3</i>                                                       | Parent from (5) |
| MKY419  | MKY6, <i>RAD52-GFP::NATMX6</i>                                                                             |                 |
| MKY1271 | MKY6, <i>RAD52-GFP::NATMX6 rtt107::KANMX6</i>                                                              |                 |
| MKY1272 | MKY6, <i>RAD52-GFP::NATMX6 smc6-9-3XHA::HIS3</i>                                                           | Parent from (5) |
| MKY1273 | MKY6, <i>RAD52-GFP::NATMX6 smc6-9-3XHA::HIS3 rtt107::KANMX6</i>                                            |                 |
| MKY1274 | MKY6, <i>RAD52-GFP::NATMX6 nse3-SB1::URA3</i>                                                              | Parent from (4) |
| MKY1275 | MKY6, <i>RAD52-GFP::NATMX6 nse3-SB1::URA3 rtt107::KANMX6</i>                                               |                 |
| MKY1276 | MKY6, <i>RAD52-GFP::NATMX6 nse5-R103G::HYGMX</i>                                                           |                 |
| MKY1277 | MKY6, <i>RAD52-GFP::NATMX6 nse5-R103G::HYGMX rtt107::KANMX6</i>                                            |                 |
| MKY317  | MKY6, <i>rtt107::KANMX6</i>                                                                                |                 |
| MKY426  | MKY6, <i>rtt107::KANMX6 nse5-R103G::NATMX6</i>                                                             |                 |
| MKY541  | MKY6, <i>smc6-9-3XHA::HIS3</i>                                                                             | Parent from (5) |
| MKY542  | MKY6, <i>smc6-9-3XHA::HIS3 rtt107::KANMX6</i>                                                              |                 |
| MKY543  | MKY399, <i>SMC6-3XHA::HIS3</i>                                                                             |                 |
| MKY544  | MKY399, <i>smc6-9-3XHA::HIS3 slx4::KANMX6</i>                                                              |                 |
| MKY547  | MKY6, <i>nse5-R103G::NATMX6 slx4::KANMX6</i>                                                               |                 |
| MKY1278 | MKY6, <i>nse5-R103G::NATMX6</i>                                                                            |                 |
| MKY1279 | MKY6, <i>slx4::KANMX6</i>                                                                                  |                 |
| MKY1280 | MKY6, <i>nse3-SB1::URA3</i>                                                                                | Parent from (4) |
| MKY1281 | MKY6, <i>nse3-SB1::URA3 rtt107::KANMX6</i>                                                                 |                 |
| MKY1282 | MKY6, <i>nse3-SB1::URA3 slx4::KANMX6</i>                                                                   |                 |
| MKY414  | MKY6, <i>SMC6-3XHA::HIS3</i>                                                                               |                 |

|         |                                                                                |  |
|---------|--------------------------------------------------------------------------------|--|
| MKY1283 | MKY6, <i>MMS21-3XHA::HIS3</i>                                                  |  |
| MKY1284 | MKY6, <i>NSE1-3XFLAG::NATMX6</i>                                               |  |
| MKY1285 | MKY6, <i>RTT107-3XVSV::KANMX6</i>                                              |  |
| MKY1286 | MKY6, <i>NSE1-3XFLAG::NATMX6 RTT107-3XVSV::KANMX6</i>                          |  |
| MKY1287 | MKY6, <i>SMC6-3XHA::HIS3 RTT107-3XVSV::KANMX6</i>                              |  |
| MKY1288 | MKY399, <i>MMS21-3XHA::HIS3 RTT107-3XVSV::KANMX6</i>                           |  |
| MKY1320 | MKY6, <i>RTT107-3XFLAG::KANMX6 sml1::HYGMX</i>                                 |  |
| MKY1321 | MKY6, <i>RTT107-3XFLAG::KANMX6 sml1::HYGMX mec1::HIS3</i>                      |  |
| MKY1322 | MKY6, <i>RTT107-3XFLAG::KANMX6 sml1::HYGMX nse3-SB1::URA3</i>                  |  |
| MKY1323 | MKY6, <i>RTT107-3XFLAG::KANMX6 sml1::HYGMX nse3-SB1::URA3 mec1::HIS3</i>       |  |
| MKY1324 | MKY6, <i>RTT107-3XFLAG::KANMX6 sml1::HYGMX nse5-R103G::NATMX6</i>              |  |
| MKY1325 | MKY399, <i>RTT107-3XFLAG::KANMX6 sml1::HYGMX nse5-R103G::NATMX6 mec1::HIS3</i> |  |
| MKY1326 | MKY6, <i>RTT107-3XFLAG::KANMX6 sml1::HYGMX smc6-9-3XHA::HIS3</i>               |  |
| MKY1327 | MKY6, <i>RTT107-3XFLAG::KANMX6 sml1::HYGMX smc6-9-3XHA::HIS3 mec1::NATMX6</i>  |  |
| MKY1334 | MKY6, <i>SLX4-3XFLAG::NATMX6 SMC5-3XHA::HIS3</i>                               |  |
| MKY1335 | MKY6, <i>RTT107-TAP::TRP1 SLX4-3XFLAG::NATMX6 SMC5-3XHA::HIS3</i>              |  |

\* unless otherwise indicated, all strains were constructed for this work (details available upon request) or were from the laboratory collections. All strains are in the W303 background, except for strains MKY1237-MKY1256.

## References

1. James, P., Halladay, J., and Craig, E. A. (1996) *Genetics* **144**, 1425-1436
2. Haber, J. E. (2002) *Methods Enzymol.* **350**, 141-164
3. Nielsen, I., Bentsen, I. B., Lisby, M., Hansen, S., Mundbjerg, K., Andersen, A. H., and Bjergbaek, L. (2009) *Nat. Methods* **6**, 753-757
4. Ben-Aroya, S., Coombes, C., Kwok, T., O'Donnell, K. A., Boeke, J. D., and Hieter, P. (2008) *Mol. Cell* **30**, 248-258
5. Torres-Rosell, J., Machin, F., Farmer, S., Jarmuz, A., Eydmann, T., Dalgaard, J. Z., and Aragon, L. (2005) *Nat. Cell Biol.* **7**, 412-419

**Supplementary Table 2.** Primers used in this study for qPCR

|          | <b>Forward</b>            | <b>Reverse</b>            | <b>Location</b>       |
|----------|---------------------------|---------------------------|-----------------------|
| MAT      | CCCATCGTCTTGCTCTTGTT      | ATCCGTCCCGTATAGCCAAT      | 0.2 kb from HO site   |
| TAF2     | CAAGGATGCCCTTGTTTTGT      | TTTTGACGGCCAATCTTTTC      | 1 kb from HO site     |
| YCR043C* | CCAAGGAACTAATGATCTAAGCACA | CATGTTGGTACTCTAAATCACCTCC | 5 kb from HO site     |
| IMG1*    | TGGATCATGGACAAGGTCCTAC    | GGCGAAAACAATGGCACTCT      | 10 kb from HO site    |
| PWP2*    | GACACACTTTACTTTGGCTTGGTT  | GACTTCCAAAGACTTAAGCGCA    | 20 kb from HO site    |
| FRT†     | AAGTTCGACATGGGCTTCAG      | TGATCTGCATGGGTTCGTTA      | 0.1 kb from FRT site  |
| ROG3†    | ATCTTTGCCAAATTGCTTCG      | TTTGTCGGGCCATGAGTTAT      | 0.85 kb from FRT site |
| ATG18†   | GAAACTTCCCGTTGAAACCA      | TATCCATCCGAGGAAACGAC      | 2.7 kb from FRT site  |
| LSB3†    | AAGAACGAGCCCTTGACTGA      | TCGACGATGATGATGACGAT      | 5.8 kb from FRT site  |
| CDC14    | TATTCGCCGTAGAAAGGTTGG     | TTGGCGGCTTATATCCCTTA      | 12 kb from FRT site   |
| PRP8     | GGATGTATCCAGAGGCCAAT      | AACCCGCGTATTAAGCCATA      | Reference locus       |

\* Primer sequences from Kim, J. A., and Haber, J. E. (2009) *Proc. Natl. Acad. Sci. U. S. A.* **106**, 1151-1156

† Primer sequences from Nielsen, I., Bentsen, I. B., Lisby, M., Hansen, S., Mundbjerg, K., Andersen, A. H., and Bjergbaek, L. (2009) *Nat. Methods* **6**, 753-757
